## Interaction Between IGF Binding Protein-3 and TGF $\beta$ in the Regulation of Adipocyte Differentiation

Hasanthi C. de Silva, Sue M. Firth, Stephen M. Twigg, and Robert C. Baxter

Kolling Institute of Medical Research, Royal North Shore Hospital (H.d.S., S.M.F., R.C.B.) and Sydney Medical School (S.M.T.), University of Sydney, Sydney, New South Wales 2065, Australia

The development of white adipose tissue involves both the hypertrophy of existing adipocytes and the proliferation and differentiation of preadipocytes. Adipogenic differentiation is inhibited by TGF $\beta$  signaling through Smad2/3, and IGF binding protein-3 (IGFBP-3) is also known to activate Smad2/3 signaling in some cell types. We previously reported that exogenous or overexpressed IGFBP-3 inhibits adipogenesis in 3T3-L1 cells, but the role of endogenous IGFBP-3 in this process, and its possible interaction with TGF $\beta$ , is not known. During 10-d adipogenic differentiation initiated by insulin, dexamethasone, and 3-isobutyl-1-methylxanthine, 3T3-L1 cells expressed increasing levels of IGFBP-3 and TGF $\beta$ 1, secreting over 1000 pg/ml of both proteins. Exogenous recombinant human IGFBP-3 paralleled TGF $\beta$ 1 in stimulating Smad2 phosphorylation in 3T3-L1 preadipocytes, but no additive effect was observed for the two agents. In contrast, knockdown of endogenous IGFBP-3 by small interfering RNA (siRNA) significantly impaired Smad2 activation by 0.25 ng/ml TGF $\beta$ 1. Transient expression of human IGFBP-3 significantly inhibited the induction of adipogenic markers adiponectin and resistin, and the appearance of lipid droplets, but down-regulation of endogenous IGFBP-3 by siRNA had little effect on the expression of either marker during the 10-d differentiation, compared with nonsilencing control siRNA. However, down-regulation of endogenous IGFBP-3 using two different siRNA significantly reversed the inhibitory effect of TGF $\beta$ 1 on both adiponectin and resistin induction. We conclude that IGFBP-3 activates inhibitory Smad signaling in 3T3-L1 cells and that endogenous IGFBP-3 modulates their adipogenic differentiation by regulating cell sensitivity towards the inhibitory effect of TGF $\beta$ . (*Endocrinology* 153: 4799–4807, 2012)

The development and expansion of white adipose tissue involves both the hypertrophy of existing adipocytes and the proliferation and differentiation of precursor cells (preadipocytes), the process of adipogenesis (1–5). Adipogenesis occurs in two steps: the differentiation of multipotent precursors, mesenchymal stem cells, to committed preadipocytes, and the terminal differentiation of preadipocytes to mature adipocytes (6, 7). Understanding the biochemical mechanisms that regulate adipogenesis would be an important step in controlling fat cell numbers and, thus, modulating obesity.

Among the significant drivers of the tightly controlled adipogenic program are members of the CCAAT/enhancer-

binding protein (C/EBP) family of transcription factors and peroxisome proliferator-activated receptor- $\gamma$  (PPAR $\gamma$ ), described as a master regulator (7, 8). Conversely, among the most potent inhibitors of adipogenesis are members of the Wnt family of secreted proteins and cytokines of the TGF $\beta$  family (7, 9, 10). There are numerous points of cross talk between the stimulatory and inhibitory regulators: for example, TGF $\beta$  and its signaling intermediate Smad3 down-regulate C/EBP-mediated PPAR $\gamma$  expression (but not activity) (11) and Wnt signaling inhibits PPAR $\gamma$  expression (12), whereas PPAR $\gamma$  activation down-regulates many genes involved in both TGF $\beta$  and Wnt signaling (13).

ISSN Print 0013-7227 ISSN Online 1945-7170

Printed in U.S.A.

Copyright © 2012 by The Endocrine Society

doi: 10.1210/en.2011-1444 Received July 1, 2011. Accepted July 31, 2012.

First Published Online August 21, 2012

Abbreviations: C/EBP, CCAAT/enhancer-binding protein; FBS, fetal bovine serum; hIGFBP-3, human IGFBP-3; HMBS, hydroxymethylbilane synthase; IBMX, 3-isobutyl-1-methylxanthine; IGFBP-3, IGF binding protein-3; mIGFBP-3, mouse IGFBP-3; MS, mouse serum; PPAR $\gamma$ , peroxisome proliferator-activated receptor- $\gamma$ ; pSmad, phosphoSmad; qRT-PCR, quantitative RT-PCR; RXR, retinoid X receptor; siRNA, small interfering RNA; TBS-T, Tris-buffered saline with Tween 20; T $\beta$ RI, type I TGF $\beta$  receptor.

IGF binding protein-3 (IGFBP-3) is a secreted glycoprotein that has multiple roles in mammalian physiology (14). In the circulation, it transports the anabolic and mitogenic peptides IGF-I and IGF-II and regulates their access to target tissues (15). At the tissue level, IGFBP-3 affects IGF signaling through the IGF-I receptor, both by directly binding the IGFs (14) and by an IGF-binding-independent mechanism (16). IGFBP-3 also modulates the signaling activity of other cell surface receptors in both malignant and nonmalignant cell types, including the type I TGF $\beta$  receptor (T $\beta$ RI)/T $\beta$ RII system in human breast cancer (17) and intestinal smooth muscle cells (18) and the epidermal growth factor receptor in phenotypically normal mammary epithelial cells (16). It can cause apoptosis by both inducing Bax (19) and binding to it in mitochondria (20). Further, IGFBP-3 is known to translocate to the nucleus in some cell types (21) and, by interacting with the retinoid X receptor (RXR) (22) and other nuclear receptors (23), can modulate transcriptional activity.

We have previously reported that human IGFBP-3 (hIGFBP-3), administered either as the exogenous recombinant protein or by transfection of cDNA, inhibits the differentiation of murine 3T3-L1 preadipocytes to mature adipocytes (24). Because IGFBP-3 was shown to bind to PPAR $\gamma$ , block PPAR $\gamma$ -RXR $\alpha$  heterodimer formation, and inhibit PPAR $\gamma$  ligand-activated transcriptional activity, this was proposed as a likely inhibitory mechanism (24). An additional mechanism is suggested (25) by the observation that IGFBP-3 activates TGF $\beta$  receptor signaling in a variety of cell models (17, 18, 26), initiating Smad-dependent pathways known to potently inhibit adipogenesis (11). Our original study showing the inhibitory effect of IGFBP-3 on adipogenesis (24) did not reveal the role of endogenous IGFBP-3 in preadipocyte differentiation, which is relevant because adipose tissue is known to express IGFBP-3 (27). We now describe experiments suggesting that endogenous IGFBP-3 exerts a tonic inhibitory role on 3T3-L1 adipogenesis, which involves interaction with the TGF $\beta$  signaling pathway.

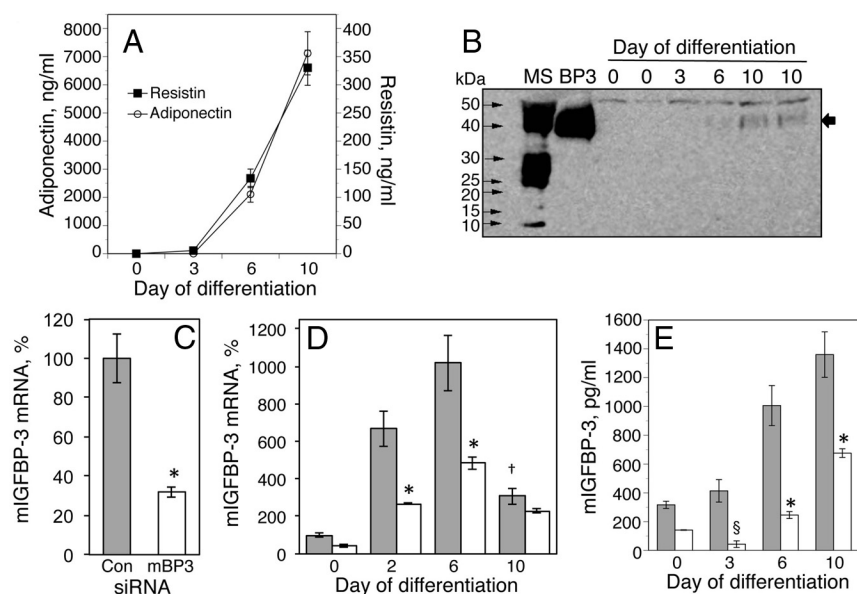

**FIG. 1.** Expression of mIGFBP-3 by 3T3-L1 preadipocytes over 10 d of adipogenic differentiation. **A**, Time course of the appearance of resistin (squares) and adiponectin (circles) measured by ELISA in the medium conditioned by 3T3-L1 preadipocytes at d 0, 3, 6, and 10 after the initiation of differentiation. Mean values  $\pm$  SEM pooled from two independent experiments, each in duplicate. **B**, Western immunoblot for mIGFBP-3 in 5- $\mu$ l samples of medium conditioned by 3T3-L1 cells at d 0, 3, 6, and 10 after the initiation of differentiation. Normal mouse serum (MS) (2  $\mu$ l) and recombinant hIGFBP-3 (BP3) (20 ng) were run on the same blot for comparison. *Left arrows* indicate molecular weight markers, and *right arrow* indicates IGFBP-3. **C**, Expression of mIGFBP-3 mRNA at d 0 of differentiation, determined by qRT-PCR, in 3T3-L1 cells treated with control siRNA (shaded bars) or mIGFBP-3 siRNA (white bars). **D**, Expression of mIGFBP-3 mRNA over 10 d of differentiation in 3T3-L1 cells treated with control siRNA (shaded bars) or mIGFBP-3 siRNA (white bars). Means  $\pm$  SEM of triplicates from a single experiment, representative of three similar experiments. **E**, Detection of mIGFBP-3 by ELISA in medium from differentiating 3T3-L1 cells treated 48 h before the initiation of differentiation with control siRNA (shaded bars) or mIGFBP-3 siRNA (white bars). Mean values  $\pm$  SEM from two experiments in duplicate. Overall effect of siRNA by ANOVA:  $F = 40.575$ ,  $P < 0.001$  (for mRNA);  $F = 1186.8$ ,  $P < 0.001$  (for protein).  $\S$ ,  $P < 0.005$  and \*,  $P < 0.001$  by ANOVA vs. control siRNA at the same day;  $\dagger$ ,  $P < 0.001$  vs. control siRNA at d 6.

## Materials and Methods

### Materials

Fetal bovine serum (FBS) used for cell culture was purchased from Thermo Trace (Noble Park, Victoria, Australia). Penicillin, streptomycin, 3-isobutyl-1-methylxanthine (IBMX), insulin from bovine pancreas, dexamethasone, and biotin were from Sigma-Aldrich (St. Louis, MO). Mouse IGFBP-3 (mIGFBP-3) antibody was purchased from R&D Systems (Minneapolis, MN) (specificity in Western blotting not stated;  $\sim 5\%$  cross-reactivity with hIGFBP-3 by ELISA). Phosphorylated Smad2 antibody (reactive only with Smad2 phosphorylated at both Ser465 and Ser467) and total Smad2 antibody (also reactive with Smad3) were from Cell Signaling Technology (Beverly, MA). NuPAGE products and electrophoresis equipment and reagents were from Invitrogen (Carlsbad, CA). Recombinant hIGFBP-3 was expressed in human 911 retinoblastoma cells as previously described (28). Recombinant hTGF $\beta$ 1 protein was purchased from Austral Biologicals (San Ramon, CA). mIGFBP-3, adiponectin, and resistin ELISA kits were from R&D Systems. PhosSTOP phosphatase inhibitors were from Roche (Castle Hill, New South Wales, Australia).

### 3T3-L1 cell culture and differentiation

3T3-L1 preadipocytes (American Type Culture Collection, Manassas, VA) were

maintained in DMEM (Thermo Scientific, Waltham, MA) containing 4.5 g/liter D-glucose and 4 mM L-glutamine, and supplemented with 10% heat-inactivated FBS at 37 C in 5% CO<sub>2</sub>. Cells were passaged before reaching 50% confluence. For differentiation experiments, 2 d after confluence or after transfection (d 0), 3T3-L1 cells were induced to differentiate for 3 d with the addition of 0.5 mM IBMX, 0.1 μg/ml dexamethasone, 0.7 μM insulin, 0.4 μM biotin, and penicillin-streptomycin in DMEM supplemented with 10% FBS. The cells were then maintained in DMEM supplemented with 10% FBS, 20 μM insulin, and penicillin-streptomycin for a further 3 d and then changed to DMEM containing 10% FBS and penicillin-streptomycin for another 4 d, for a total of 10 d. The effect of TGFβ on differentiating cells was examined by the addition of recombinant hTGFβ1 protein at indicated concentrations with every media change during the 10-d differentiation process. Conditioned media were collected at indicated time points during the differentiation process. At d 10, cells were harvested and processed for gene expression analysis as described below. For short-term signaling experiments, cells were treated with IGFBP-3 and TGFβ1 at the indicated concentrations and time and then processed for immunoblotting as described below.

### Transient transfections

Two small interfering RNA (siRNA) duplexes (QIAGEN, Valencia, CA) targeting the endogenous mIGFBP-3 gene,

siRNA#1 (Mm\_Igfbp3\_1 HP) and siRNA#2 (Mm\_Igfbp3\_3 HP), were used to achieve knockdown, and AllStars Negative Control siRNA (QIAGEN) was used as the control. At 24 h after plating, 1 μg of siRNA was transfected into 1 × 10<sup>5</sup> cells using HiPerfect transfection reagent (QIAGEN) according to the manufacturer's instructions. Differentiation or signaling experiments were then performed 48 h after transfection. For overexpression studies, the hIGFBP-3 cDNA (29) was subcloned into pcDNA4/TO (Invitrogen). 3T3-L1 fibroblast cells were transfected using AMAXA Nucleofector system (Lonza, Cologne, Germany) according to the method recommended by the manufacturer. In brief, cells were harvested, and 1 × 10<sup>6</sup> cells were resuspended in 100 μl of AMAXA Nucleofector solution V. The cell suspension was mixed with 1 μg of siRNA or 4 μg of IGFBP-3 DNA plasmid for siRNA knockdown and IGFBP-3 overexpression experiments, respectively. Subsequently, the cells were nucleofected using program T-030 and mixed with the prewarmed media before plating.

### RNA isolation and real-time PCR

Cells were washed with PBS, and total cellular RNA was extracted using TRIzol reagent (Invitrogen) and precipitated with the addition of isopropanol. Samples were treated with deoxyribonuclease I enzyme (QIAGEN), and RNA was quantitated using the NanoDrop ND-1000 Spectrophotometer (NanoDrop Technologies, Wilmington, DE). Total RNA (1 μg) was RT to cDNA using Superscript III First Strand Synthesis Supermix kit (Invitrogen) according to the manufacturer's instructions. Quantitative real-time PCR analysis using TaqMan probes (Applied Biosystems, Foster City, CA) for mIGFBP-3 (Mm01187817\_m1), hIGFBP-3 (Hs00181211\_m1), murine adiponectin (Mm00456425\_m1), and murine resistin (Mm00445641\_m1) was performed in an ABI 7900HT (Applied Biosystems). The comparative cycle method was used for gene expression analysis by using hydroxymethylbilane synthase (HMBS) (Mm00660260\_m1) as the endogenous control.

### Immunoassays and Western immunoblotting

The protein levels in the conditioned media of differentiating cells were measured using mIGFBP-3, TGFβ, adiponectin, and resistin ELISA kits (R&D Systems) according to the manufacturer's instructions. Secreted hIGFBP-3 was measured by in-house RIA. To measure Smad2 activation by immunoblot, 2 d after confluence or after transfection, cells were treated with TGFβ1 and/or IGFBP-3 in duplicate for the indicated times. Cells were washed with PBS and lysed in Laemmli sample buffer [62.5 mM Tris-HCl (pH 6.8), containing 2% wt/vol sodium dodecyl sulfate, 10% vol/vol glycerol, 0.01% wt/vol bromophenol blue, and 50 mM dithio-

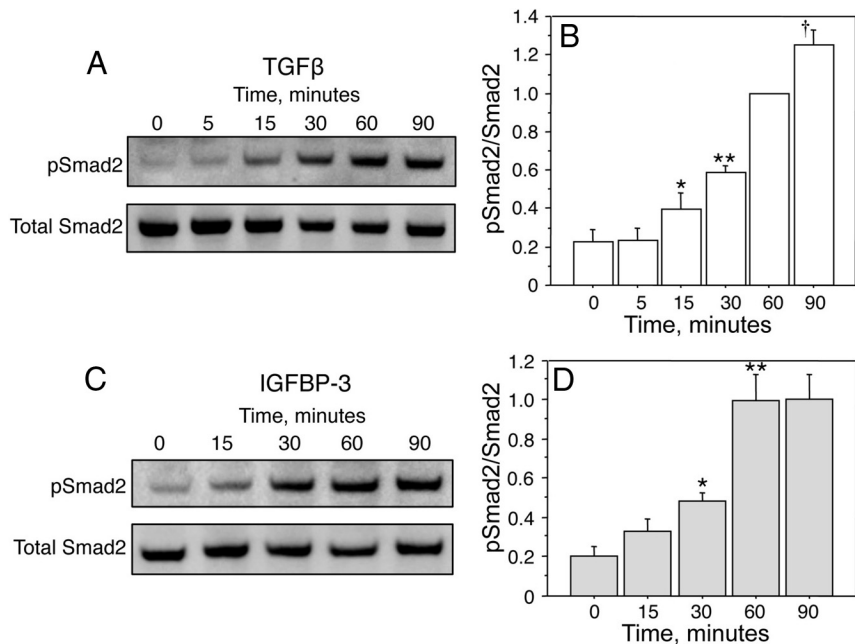

**FIG. 2.** Stimulation of Smad2 phosphorylation by TGFβ1 and IGFBP-3 in 3T3-L1 preadipocytes. A, Representative Western blotting showing the time course of increase in phospho-Smad2 (Ser465/467) after addition of 1 ng/ml human TGFβ1. B, Pooled pixel count data from three experiments, each in duplicate, showing the ratio of phospho/total Smad2, expressed relative to the 60-min ratio. Error bars indicate SEM of pooled data. Analysis by two-factor ANOVA: for the overall effect of time,  $F = 60.686$ ,  $P < 0.001$ . \*, Significant stimulation compared with time 0 ( $P < 0.05$ ); \*\*, all later time points showed significant stimulation compared with time 0 ( $P < 0.001$ ); †, significant stimulation compared with 60 min ( $P = 0.004$ ). C, Representative Western blotting showing the time course of increase in phospho-Smad2 after addition of 500 ng/ml recombinant hIGFBP-3. D, Pooled pixel count data from three experiments, each in duplicate, showing the ratio of phospho/total Smad2, expressed relative to the 60-min ratio. Error bars indicate SEM of pooled data. Analysis by two-factor ANOVA: for the overall effect of time,  $F = 15.957$ ,  $P < 0.001$ . Stimulation approached significance at 30 min (\*,  $P = 0.052$ ) and was highly significant at 60 and 90 min (\*\*,  $P < 0.001$ ).

threitol] containing phosphatase inhibitors (1 $\times$ ), and sonicated. Prepared lysates and conditioned media samples were separated on 10% NuPAGE Bis-Tris gels under reducing conditions. Proteins were transferred to Hybond C-Extra nitrocellulose membranes (GE Healthcare, Little Chalfont, Bucks, UK) and subsequently blocked in Tris-buffered saline with Tween 20 (TBS-T) [10 mM Tris, 150 mM NaCl (pH 7.4), containing 0.1% vol/vol Tween 20] containing 5% skim milk powder for 1 h, then probed with phosphorylated Smad2 (Ser465/467), total Smad2, or mIGFBP-3 primary antibodies diluted in TBS-T containing 5% skim milk powder overnight at 4 C. Membranes were washed in cold TBS-T and incubated with the appropriate horseradish peroxidase-labeled secondary antibodies (Amersham Biosciences, Piscataway, NJ) for a further 2 h at room temperature. Membranes were again washed and developed using enhanced chemiluminescence plus Western Blot Detection System (GE Healthcare), and bands were visualized using a LAS3000 imaging system (FujiFilm, Tokyo, Japan) and quantitated using MultiGuage 3.0 software (Science Lab; FujiFilm).

### Nile red staining

Ten days after differentiation, cells were fixed with 10% formalin (Sigma-Aldrich), stained with Nile red at a final working

concentration of 1  $\mu$ g/ml, and viewed under an Olympus IX70 inverted fluorescent microscope (Olympus Corp., Tokyo, Japan) at 485 nm excitation/525 nm emission.

### Statistics

All experiments were performed independently at least three times each in duplicate or triplicate. Statistical analysis by ANOVA, as indicated in the text or figure legends, was performed using Statview version 5 (Abacus Concepts, Berkeley, CA) or SPSS version 19 (SPSS, Inc., Chicago, IL). For comparisons of time series, repeated measures ANOVA was used to examine overall effects. All ANOVA analyses were conducted on combined data from multiple experiments and included a factor for experiment number in addition to the treatment factor(s). *Post hoc* testing was by Fisher's least significant difference test.  $P < 0.05$  was considered statistically significant.

### Results

Among the growing number of adipokines that are recognized to communicate a variety of paracrine and endocrine functions of adipocytes (30), adiponectin and resistin are easily measured secreted proteins that serve as useful markers of adipogenesis. Figure 1A demonstrates the appearance of these adipogenic markers, measured by ELISA in the culture medium of 3T3-L1 preadipocytes over the 10-d course of differentiation induced by the addition of insulin, IBMX, and dexamethasone. Although mature white adipose tissue has a high level of IGFBP-3 gene expression (27), lower expression might be expected in preadipocytes, because we have shown that IGFBP-3 is inhibitory to adipogenesis (24). Endogenous mIGFBP-3, detected by immunoblot in culture medium conditioned by differentiating 3T3-L1 cells, was not visible before the initiation of differentiation (d 0), or on d 3, and was first detected at d 6 as the expected diffuse 40–45 kDa doublet band, increasing at d 10 (Fig. 1B). For comparison, mIGFBP-3 immunoreactivity in 2  $\mu$ l of normal mouse serum (MS) and 20 ng of recombinant hIGFBP-3 are also shown. The MS contains both intact IGFBP-3 (40–45 kDa) and proteolysed IGFBP-3 (25–30 kDa). To evaluate the role of endogenous mIGFBP-3, its expression was down-

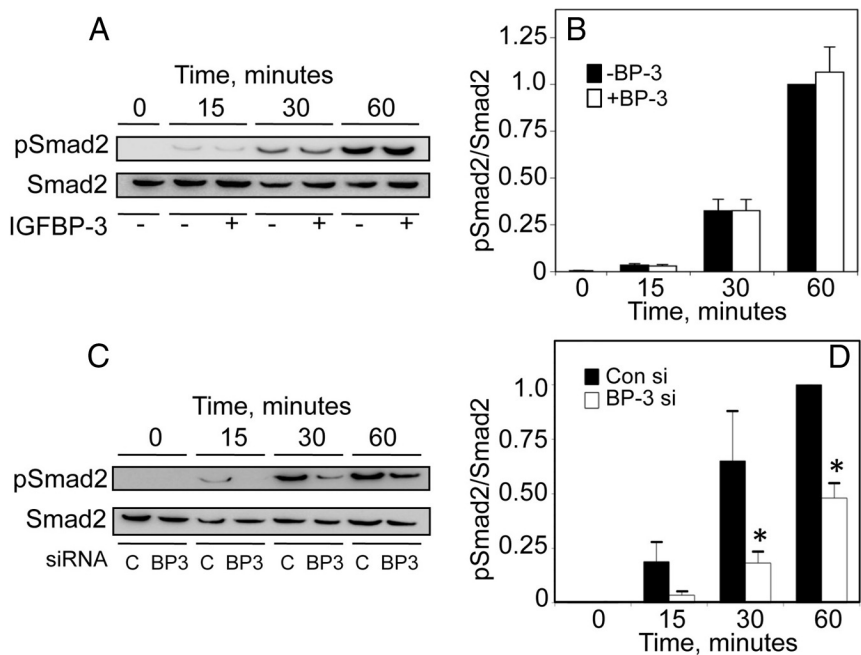

**FIG. 3.** Interaction between TGF $\beta$ 1 and IGFBP-3 in the stimulation of Smad2. A, Representative Western blotting showing the time course of increase in phospho-Smad2 (Ser465/467) after addition of 0.25 ng/ml rhTGF $\beta$ 1, without or with the addition of 500 ng/ml IGFBP-3 as indicated. B, Pooled pixel count data from three Western blot experiments, in which phospho-Smad2 was measured at the indicated times in response to 0.25 ng/ml TGF $\beta$ 1 alone (black bars, -BP-3), or together with 500 ng/ml IGFBP-3 (white bars, +BP-3). Data represent mean  $\pm$  SEM of pooled data. Adding IGFBP-3 did not enhance the TGF $\beta$ 1 effect ( $P = 0.77$  by ANOVA). C, Representative Western blotting showing the time course of increase in phospho-Smad2 after addition of 0.25 ng/ml rhTGF $\beta$ 1 in cells that had been treated 48 h previously with control siRNA or IGFBP-3 siRNA#2 as indicated. D, Pooled data from three Western blot experiments, in which phospho-Smad2 was measured at the indicated times in response to 0.25 ng/ml TGF $\beta$ 1 in cells treated 48 h previously with control (Con) siRNA (black bars), or IGFBP-3 siRNA (white bars). Data represent mean  $\pm$  SEM of pooled data. The effect of down-regulating IGFBP-3 was significant overall by repeated measures ANOVA ( $F = 9.164$ ,  $P = 0.013$ ). Two-factor ANOVA: \*,  $P < 0.001$  for control vs. IGFBP-3 siRNA at the indicated time points.

regulated using a specific siRNA, with a nonsilencing siRNA used as a control, and the extent of down-regulation was evaluated by measuring mIGFBP-3 mRNA by quantitative RT-PCR (qRT-PCR). Down-regulation of endogenous mIGFBP-3 mRNA at d 0 of differentiation, *i.e.* 48 h after siRNA transfection, was typically 60–70% compared with cells treated with the nonsilencing control siRNA (Fig. 1C). Over 10 d of differentiation, there was a highly significant effect of both time and siRNA treatment on mIGFBP-3 expression (both  $P < 0.001$  by ANOVA). Substantial down-regulation at the gene expression level was evident at d 2 and 6 of differentiation ( $P < 0.001$ ), but the difference between control and siRNA treatments was lost by d 10 (Fig. 1D). Interestingly, in three repeat experiments, a decline in mIGFBP-3 mRNA was observed between d 6 and 10 of differentiation. In contrast, a monotonic increase in secreted protein levels measured by ELISA was seen over 10 d (Fig. 1E), perhaps reflecting the stability of accumulating IGFBP-3 in the culture medium despite a decline in the rate of new synthesis after d 6. In cells treated with mIGFBP-3 siRNA before differentiation, a significant decrease in secreted IGFBP-3 was observed over the 10-d time course ( $P < 0.001$  by repeated measures ANOVA) and at individual d 3, 6, and 10 (Fig. 1E).

To determine whether IGFBP-3 might signal through the TGF $\beta$  receptor system in 3T3-L1 cells, as shown for some other cell types, Smad2 phosphorylation was measured by immunoblotting in response to recombinant TGF $\beta$ 1 and IGFBP-3. Figure 2A shows the time course of Smad2 activation by 1 ng/ml (0.023 nmol/liter) TGF $\beta$  in 3T3-L1 preadipocytes. Determined as an increase in the ratio of phosphoSmad2 (pSmad2) to total Smad2, averaged over three experiments (Fig. 2B), there was a significant increase in Smad2 phosphorylation within 15 min of exposure to TGF $\beta$  ( $P < 0.05$ ) with a 5-fold increase, compared with time 0, seen at 60 min ( $P < 0.001$ ). Beyond 60 min, a further small increase in phosphorylation was seen at 90 min ( $P = 0.004$  compared with 60 min). Comparable results were seen when IGFBP-3 was used instead of TGF $\beta$ . Recombinant hIGFBP-3 was used at a concentration of 500 ng/ml (~12 nmol/liter) after preliminary experiments showed that higher doses gave little or no further stimulation (data not shown). A similar concentration has been used previously to study TGF $\beta$  receptor activation in other cell types (17, 18, 26). Figure 2C shows the time course of Smad2 activation by 500 ng/ml IGFBP-3. Determined as an increase in the ratio of pSmad2 to total Smad2, averaged over three experiments (Fig. 2D), the earliest increase in the pSmad/Smad ratio was seen at 30 min of exposure to IGFBP-3 ( $P = 0.052$ ) with a 5-fold increase, compared with time 0, at 60 min ( $P < 0.001$ ). Beyond 60 min, there was no further increase in Smad2 phosphorylation in response to IGFBP-3.

The interaction between IGFBP-3 and TGF $\beta$  on Smad2 activation in 3T3-L1 preadipocytes was tested in two ways: by adding exogenous recombinant proteins together and by testing TGF $\beta$  when endogenous IGFBP-3 was down-regulated by siRNA. As shown in Fig. 3A and analyzed for three independent experiments in Fig. 3B, there was a no significant additional effect on Smad2 activation of adding 500 ng/ml IGFBP-3 together with TGF $\beta$ 1, above the effect of TGF $\beta$  alone, indicating that the stimulatory effect of TGF $\beta$  alone was maximal. In contrast, a considerable decrease in the stimulation of Smad2 phosphorylation by TGF $\beta$  was observed when endogenous IGFBP-3 was down-regulated (Fig. 3C), significant over the full time course ( $P = 0.013$ , repeated measures ANOVA) and at the 30- and 60-min time points ( $P < 0.001$ ), but not at 15 min ( $P = 0.184$ ), when analyzed for three independent experiments (Fig. 3D). A second IGFBP-3 siRNA also attenuated TGF $\beta$ 1-stimulated Smad2 activation (data not shown). Together, these data indicate that exogenous TGF $\beta$  and IGFBP-3, at their respective optimal doses, can activate TGF $\beta$  receptor signaling to a similar extent in 3T3-L1 preadipocytes, and endogenous IGFBP-3 contributes to the maximal stimulatory effect of TGF $\beta$  on Smad2 activation.

Newly synthesized TGF $\beta$  exists as a latent complex, which can be activated by proteolysis and other mechanisms to release the active growth factor (31). To assess the relationship between the exogenous TGF $\beta$  concentration (1 ng/ml) used to stimulate Smad2 phosphorylation and endogenous TGF $\beta$  in 3T3-L1 preadipocytes, the total (latent + active) and active TGF $\beta$ 1 pools were measured by ELISA. As shown in Fig. 4A for one experiment of four, active TGF $\beta$ 1 levels in conditioned media were low (undetectable in some experiments) in preadipocytes and in-

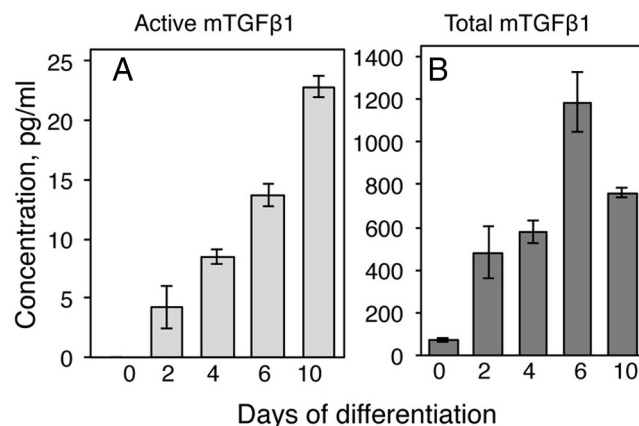

**FIG. 4.** Time course of mTGF $\beta$ 1 concentration in culture media conditioned by differentiating 3T3-L1 cells. A, Active mTGF $\beta$ 1 was measured by ELISA in conditioned medium collected at the indicated time points. B, Total mTGF $\beta$ 1 was measured in the same samples after transient acidification with 0.17 M HCl. Data, corrected for the active or total TGF $\beta$ 1 content of the FBS in unconditioned media, are mean values  $\pm$  SEM from a single experiment, representative of four.

creased as early as d 2 after the initiation of differentiation, reaching 20–70 pg/ml by d 10. Calculated over four independent experiments, the mean concentration of active TGF $\beta$ 1 at d 0 was  $10.0 \pm 4.8$  pg/ml (SEM), rising to  $49.5 \pm 7.9$  pg/ml at d 10, a concentration inhibitory to 3T3-L1 differentiation (32). However, the potential pool of active TGF $\beta$ 1 is much greater, because the total TGF $\beta$ 1 pool exceeded 1 ng/ml by d 6, falling slightly at d 10 (Fig. 4B). Calculated over four independent experiments, the mean concentration of total TGF $\beta$ 1 at d 0 was  $199 \pm 75$  pg/ml (SEM), rising to  $1190 \pm 165$  pg/ml at d 10. This suggests that the endogenous pool of latent TGF $\beta$ 1 exceeds that required to generate active TGF $\beta$ 1 capable of fully stimulating the Smad pathway and inhibiting adipogenesis.

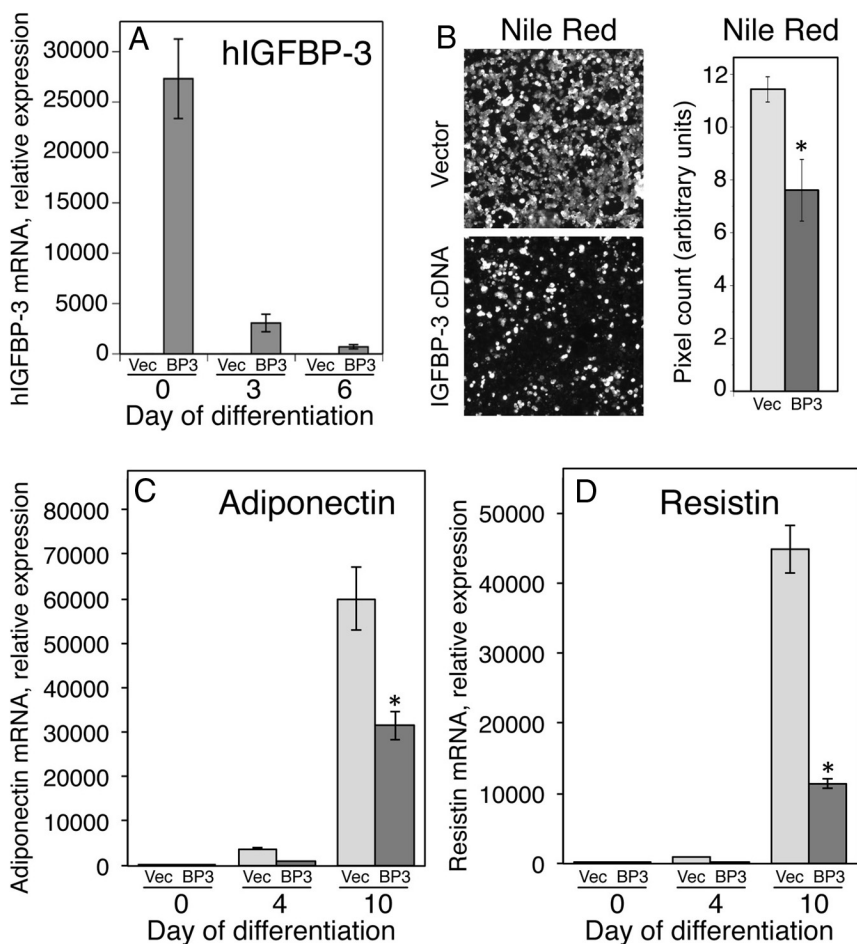

**FIG. 5.** Effect of hIGFBP-3 overexpression on the differentiation of 3T3-L1 cells. Cells were transiently transfected to express hIGFBP-3, 48 h before the initiation of differentiation. A, hIGFBP-3 mRNA measured by qRT-PCR in cells expressing vector (Vec) alone or IGFBP-3 (BP3) cDNA at the days indicated; mean values  $\pm$  SEM from two experiments in duplicate. B, Lipid droplets were stained with Nile red (left) and quantitated by densitometry in arbitrary units (right) from four fields each of duplicate wells of cells expressing vector alone (light shading) or IGFBP-3 cDNA (dark shading) at d 10. \*, Effect of treatment significant by ANOVA,  $F = 32.63$ ,  $P < 0.001$ . Adiponectin (C) and resistin (D) mRNA was measured by qRT-PCR in cells expressing vector alone (light shading) or IGFBP-3 cDNA (dark shading) at the days indicated. Data are means  $\pm$  SEM, normalized to the expression of the housekeeping gene HMBS, and expressed as relative increase compared with uninduced (d 0) cells. \*, The inhibitory effect of IGFBP-3 expression was significant by ANOVA on both adiponectin ( $P = 0.007$ ) and resistin ( $P < 0.001$ ) mRNA levels.

We previously reported that exogenous IGFBP-3, or stably transfected IGFBP-3, was inhibitory to 3T3-L1 preadipocyte differentiation (24) and in this study confirmed similar inhibition when IGFBP-3 was expressed transiently, 48 h before the induction of differentiation. Figure 5A shows the ectopically expressed hIGFBP-3 mRNA levels were high at the initiation of differentiation but declined rapidly and had almost disappeared by d 6. Corresponding levels of immunoreactive hIGFBP-3 in the culture medium, determined by RIA, were  $42.8 \pm 10.1$  ng/ml at d 0,  $20.5 \pm 4.4$  ng/ml at d 3, and  $8.1 \pm 0.9$  ng/ml at d 6 (means  $\pm$  SEM from three experiments in duplicate). No change in total or active TGF $\beta$ 1, measured by ELISA,

was seen in response to IGFBP-3 overexpression (data not shown). Staining for lipid droplets using Nile red (Fig. 5B) indicated substantial lipid accumulation at the end of the induction period (d 10), which was significantly attenuated when IGFBP-3 was overexpressed before d 0. Gene expression of the adipogenic markers adiponectin (Fig. 5C) and resistin (Fig. 5D) was undetectable in 3T3-L1 preadipocytes but increased many thousand-fold over the 10-d differentiation period in cells transfected with empty vector. When IGFBP-3 was overexpressed by transfection, the level of adiponectin induction was significantly reduced by approximately 50% ( $P = 0.007$ ). Similarly, the induction of resistin mRNA was inhibited by approximately 75% ( $P < 0.001$ ) when IGFBP-3 was overexpressed.

Activation of Smad2 signaling by TGF $\beta$  is known to inhibit preadipocyte differentiation (33, 34). Because TGF $\beta$ 1 and IGFBP-3 appear to act similarly in initiating Smad2 activation in 3T3-L1 preadipocytes (Fig. 2), their interaction in the inhibition of 3T3-L1 preadipocyte differentiation was examined. To evaluate whether endogenous IGFBP-3 might tonically influence differentiation, mIGFBP-3 was down-regulated approximately 70% using siRNA#2 (measured at 48 h, equivalent to d 0 of differentiation). Unexpectedly, this had little effect on the time course or magnitude of adiponectin induction (Fig. 6A) and no effect on resistin induction (Fig. 6B) over the subsequent 10 d of

3T3-L1 differentiation, suggesting at first sight that endogenous IGFBP-3 might have no role in the regulation of preadipocyte differentiation.

However, the possibility remained that endogenous IGFBP-3 might be involved through interaction with TGF $\beta$  receptor signaling. We tested this using two independent miIGFBP-3 siRNA. Compared with siRNA#2, shown in Fig. 3D, siRNA#1 was somewhat less effective, decreasing TGF $\beta$ -stimulated Smad2 phosphorylation at 30 min by approximately 50% (data not shown). Recombinant TGF $\beta$ 1 inhibited the induction of adipocyte differentiation markers markedly at 0.5 ng/ml (Fig. 6, C and D). In these experiments, down-regulation of IGFBP-3 by siRNA#2, but not siRNA#1, increased the induction of adiponectin, but not resistin, in the absence of TGF $\beta$ . In the presence of 0.25 ng/ml TGF $\beta$ , both siRNA stimulated adiponectin induction (Fig. 6C) but not resistin (Fig. 6D). In contrast, in the presence of 0.5 ng/ml TGF $\beta$ , both siRNA significantly attenuated its in-

hibitory effect, effectively preventing the inhibition of both adiponectin induction (Fig. 6C) and resistin induction (Fig. 6D) caused by 0.5 ng/ml TGF $\beta$ 1. These observations indicate that endogenous IGFBP-3 does indeed have the ability to influence the extent of preadipocyte differentiation, by affecting 3T3-L1 sensitivity to inhibition by TGF $\beta$ .

## Discussion

We have previously reported that 3T3-L1 preadipocytes stably expressing hIGFBP-3 are significantly inhibited in their ability to differentiate to mature adipocytes, as indicated by decreased induction of PPAR $\gamma$  and resistin gene expression, and decreased appearance of intracellular lipid staining by Nile red (24). However, the role of endogenous IGFBP-3 in regulating adipogenic differentiation *in vivo* has been difficult to elucidate. Mice with a targeted deletion of the *igfbp3* gene show a small but significant increase in their fat mass as a percentage of body weight compared with controls (35), consistent with an inhibitory effect of endogenous IGFBP-3 on fat mass development. In contrast, the detection, by Oil Red O staining, of fat cells in bone marrow cell cultures subjected to an adipogenic differentiation stimulus did not differ between cultures from IGFBP-3 knockout and wild-type mice (36). Expression of the adipogenic marker C/EBP $\alpha$  was significantly elevated in bone marrow from IGFBP-3-deficient mice compared with controls, again consistent with an inhibitory effect of endogenous IGFBP-3, but paradoxically, expression of the marker aP2 was significantly lower in the knockout animals, and expression of PPAR $\gamma$  was unaffected compared with controls (36). These disparate results do not allow an unambiguous conclusion as to the role of endogenous IGFBP-3 on fat cell development.

Our previous studies have shown that IGFBP-3 can activate signaling through the TGF $\beta$  receptor (T $\beta$ RI/T $\beta$ RII) pathway in breast cancer cells, inducing phosphorylation of the receptor-regulated Smads, Smad2 and Smad3 (17), a finding subsequently confirmed by others in cell lines of intestinal (18) and renal (26) or-

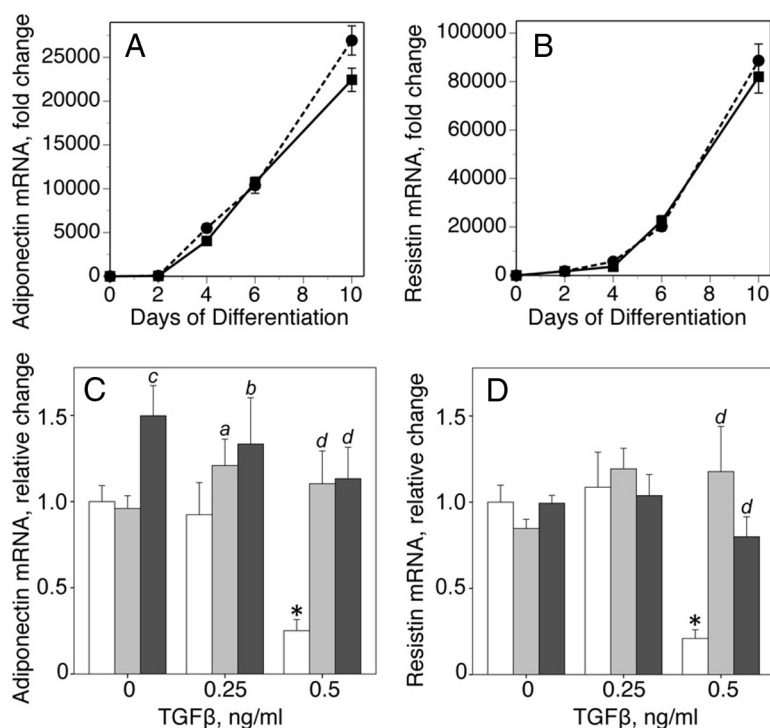

**FIG. 6.** Effect of endogenous IGFBP-3 down-regulation on the differentiation of 3T3-L1 cells. Cells were transiently transfected with a control siRNA or IGFBP-3 siRNA, 48 h before the initiation of differentiation. The time course of induction of adiponectin mRNA (A) and resistin mRNA (B) in cells expressing control siRNA (solid line) or IGFBP-3 siRNA#2 (dashed line) over 10 d of differentiation. Data are means  $\pm$  SEM of triplicates from one experiment out of three. C and D, Inhibition of adiponectin induction (C) or resistin induction (D) at d 10 of differentiation by exogenous TGF $\beta$ 1, in cells transfected with either control siRNA (open bars) or IGFBP-3 siRNA#1 (gray bars) or siRNA#2 (dark bars). Pooled data (means  $\pm$  SEM) from two independent experiments in duplicate. All mRNA levels were measured by qRT-PCR, normalized to the expression of the housekeeping gene HMBS, and expressed relative to levels in cells treated with nonsilencing siRNA in the absence of TGF $\beta$ . Analysis by two-way ANOVA: overall effect of treatment,  $F = 17.02$ ,  $P < 0.001$  for adiponectin;  $F = 9.817$ ,  $P < 0.001$  for resistin. \*,  $P < 0.0001$  vs. value for nonsilencing siRNA in the absence of TGF $\beta$ . a,  $P = 0.03$ ; b,  $P = 0.003$ ; c,  $P = 0.001$ ; d,  $P < 0.001$ , vs. value for nonsilencing siRNA at the same TGF $\beta$  concentration.

igin. The canonical ligands of this signaling system are several distinct proteins of the TGF $\beta$  family, including TGF $\beta$ 1, TGF $\beta$ 2, and TGF $\beta$ 3, all members of a much broader TGF $\beta$  superfamily (37). Of these, both TGF $\beta$ 1 and TGF $\beta$ 2 are reported to be secreted by 3T3-L1 cells (38). Because Smad2/3 activation is well recognized as being inhibitory to adipogenesis (10, 39), this raised the question of the possible interaction between IGFBP-3 and TGF $\beta$  signaling in the regulation of adipogenic differentiation. Measuring Smad2 as representative of the TGF $\beta$ -activated receptor-regulated Smads, IGFBP-3 was found to activate Smad2 phosphorylation in 3T3-L1 preadipocytes to the same extent and with a similar time course as TGF $\beta$ , when both were used at their optimal concentrations. However, although recombinant TGF $\beta$ 1 was maximally active at a concentration of 1 ng/ml or less, within the range of total immunoreactive TGF $\beta$ 1 secreted by these cells during the differentiation process, recombinant IGFBP-3 required a much higher concentration (500 ng/ml) than the 1–2 ng/ml secreted by the cells. A possible explanation is that exogenous hIGFBP-3 has lower bioactivity in this cell system than endogenously produced mIGFBP-3. This may be unrelated to the species difference, because a similar difference in apparent activity between exogenous and endogenous hIGFBP-3 in some human cell lines has been described previously (40), but to date, there is no clear explanation. It does not appear to be an intrinsic problem of the IGFBP-3 preparation itself, because the same preparation induces significant biological effects in the MCF-10A human mammary cell line at 10 ng/ml, and even 1 ng/ml (16). hIGFBP-3 circulates at about 2000–4000 ng/ml (15), and IGFBP-3 in the murine circulation has been reported at about 2000 ng/ml (41), so a concentration of 500 ng/ml is physiologically plausible if the IGFBP-3 is serum derived.

Although the explanation for the apparently greater bioactivity of endogenous mIGFBP-3 remains unclear, our study supports the concept that it has a role in regulating adipocyte sensitivity to signaling through the TGF $\beta$  pathway. Activation of Smad2 phosphorylation by 0.25 ng/ml TGF $\beta$  was significantly attenuated by IGFBP-3 silencing, and the inhibitory effect of TGF $\beta$  on the induction of adipogenic markers was essentially blocked when IGFBP-3 was down-regulated. The findings imply that endogenous IGFBP-3 has a permissive role for TGF $\beta$  action in 3T3-L1 differentiation.

We previously published evidence that the inhibitory effect of IGFBP-3 on adipogenic differentiation involved its interaction with PPAR $\gamma$ , inhibition of PPAR $\gamma$ -RXR $\alpha$  heterodimer formation, and suppression of PPAR $\gamma$  ligand-activated transcriptional activity (24). Because TGF $\beta$  and its signaling intermediate Smad3 down-regulate C/EBP-mediated PPAR $\gamma$  expression (11), the current work implicates IGFBP-3 inhibitory effects on PPAR $\gamma$  expression through TGF $\beta$  signaling and C/EBP. Combined with our earlier study

(24), it reflects that IGFBP-3 inhibits fat cell differentiation through more than one cellular mechanism, which may converge on PPAR $\gamma$ . Further, TGF $\beta$  and PPAR $\gamma$  signaling pathways have been shown to intersect at several levels in other systems, particularly in the context of fibrotic disease: for example, TGF $\beta$  down-regulates PPAR $\gamma$  expression (42, 43) and, conversely, PPAR $\gamma$  inhibits TGF $\beta$ -dependent, Smad-mediated transcriptional activity, without preventing Smad2/3 phosphorylation (44, 45). Therefore, IGFBP-3 might stimulate Smad2/3 signaling both directly through activation of the T $\beta$ RI (17) and indirectly through inhibition of PPAR $\gamma$ . In conclusion, we have demonstrated in 3T3-L1 preadipocytes that TGF $\beta$ /Smad signaling, known to be a potent regulator of fat cell differentiation, can be activated by IGFBP-3 and that endogenous IGFBP-3 in these cells is able to regulate cell sensitivity toward exogenous TGF $\beta$ . This study provides further evidence that IGFBP-3 has the potential to play a significant role in the regulation of adipogenesis.

## Acknowledgments

Address all correspondence and requests for reprints to: Dr. Robert C. Baxter, Kolling Institute of Medical Research, Royal North Shore Hospital, St. Leonards, Sydney, New South Wales 2065, Australia. E-mail: robert.baxter@sydney.edu.au.

This work was supported by the National Health and Medical Research Council, Australia, Project Grant 457373 (to S.M.T. and R.C.B.).

Disclosure Summary: The authors have nothing to disclose.

## References

1. Hausman DB, DiGirolamo M, Bartness TJ, Hausman GJ, Martin RJ 2001 The biology of white adipocyte proliferation. *Obes Rev* 2:239–254
2. Rodeheffer MS, Birsoy K, Friedman JM 2008 Identification of white adipocyte progenitor cells in vivo. *Cell* 135:240–249
3. Arner E, Westermark PO, Spalding KL, Britton T, Rydén M, Frisén J, Bernard S, Arner P 2010 Adipocyte turnover: relevance to human adipose tissue morphology. *Diabetes* 59:105–109
4. Drolet R, Richard C, Sniderman AD, Mailloux J, Fortier M, Huot C, Rheaume C, Tchernof A 2008 Hypertrophy and hyperplasia of abdominal adipose tissues in women. *Int J Obes* 32:283–291
5. Spalding KL, Arner E, Westermark PO, Bernard S, Buchholz BA, Bergmann O, Blomqvist L, Hoffstedt J, Näslund E, Britton T, Concha H, Hassan M, Rydén M, Frisén J, Arner P 2008 Dynamics of fat cell turnover in humans. *Nature* 453:783–787
6. Bowers RR, Lane MD 2008 Wnt signaling and adipocyte lineage commitment. *Cell Cycle* 7:1191–1196
7. Lefterova MI, Lazar MA 2009 New developments in adipogenesis. *Trends Endocrinol Metab* 20:107–114
8. Tontonoz P, Spiegelman BM 2008 Fat and beyond: the diverse biology of PPAR $\gamma$ . *Annu Rev Biochem* 77:289–312
9. MacDougald OA, Mandrup S 2002 Adipogenesis: forces that tip the scales. *Trends Endocrinol Metab* 13:5–11
10. Zamani N, Brown CW 2011 Emerging roles for the transforming



- growth factor- $\beta$  superfamily in regulating adiposity and energy expenditure. *Endocr Rev* 32:387–403
11. Choy L, Derynck R 2003 Transforming growth factor- $\beta$  inhibits adipocyte differentiation by Smad3 interacting with CCAAT/enhancer-binding protein (C/EBP) and repressing C/EBP transactivation function. *J Biol Chem* 278:9609–9619
  12. Ross SE, Hemati N, Longo KA, Bennett CN, Lucas PC, Erickson RL, MacDougald OA 2000 Inhibition of adipogenesis by Wnt signaling. *Science* 289:950–953
  13. Shockley KR, Lazarenko OP, Czernik PJ, Rosen CJ, Churchill GA, Lecka-Czernik B 2009 PPAR $\gamma$ 2 nuclear receptor controls multiple regulatory pathways of osteoblast differentiation from marrow mesenchymal stem cells. *J Cell Biochem* 106:232–246
  14. Firth SM, Baxter RC 2002 Cellular actions of the insulin-like growth factor binding proteins. *Endocr Rev* 23:824–854
  15. Baxter RC 1994 Insulin-like growth factor binding proteins in the human circulation: a review. *Horm Res* 42:140–144
  16. Martin JL, Lin MZ, McGowan EM, Baxter RC 2009 Potentiation of growth factor signaling by insulin-like growth factor-binding protein-3 in breast epithelial cells requires sphingosine kinase activity. *J Biol Chem* 284:25542–25552
  17. Fanayan S, Firth SM, Baxter RC 2002 Signaling through the Smad pathway by insulin-like growth factor binding protein-3 in breast cancer cells: relationship to transforming growth factor- $\beta$ 1 signaling. *J Biol Chem* 277:7255–7261
  18. Kummerle JF, Murthy KS, Bowers JG 2004 IGFBP-3 activates TGF- $\beta$  receptors and directly inhibits growth in human intestinal smooth muscle cells. *Am J Physiol Gastrointest Liver Physiol* 287:G795–G802
  19. Butt AJ, Firth SM, King MA, Baxter RC 2000 Insulin-like growth factor-binding protein-3 modulates expression of Bax and Bcl-2 and potentiates p53-independent radiation-induced apoptosis in human breast cancer cells. *J Biol Chem* 275:39174–39181
  20. Jia Y, Lee KW, Swerdloff R, Hwang D, Cobb LJ, Sinha Hikim A, Lue YH, Cohen P, Wang C 2010 Interaction of insulin-like growth factor-binding protein-3 and BAX in mitochondria promotes male germ cell apoptosis. *J Biol Chem* 285:1726–1732
  21. Schedlich LJ, Le Page SL, Firth SM, Briggs LJ, Jans DA, Baxter RC 2000 Nuclear import of insulin-like growth factor binding protein-3 (IGFBP-3) and IGFBP-5 is mediated by the importin  $\beta$  subunit. *J Biol Chem* 275:23462–23470
  22. Liu B, Lee HY, Weinzimer SA, Powell DR, Clifford JL, Kurie JM, Cohen P 2000 Direct functional interactions between insulin-like growth factor-binding protein-3 and retinoid X receptor- $\alpha$  regulate transcriptional signaling and apoptosis. *J Biol Chem* 275:33607–33613
  23. Schedlich LJ, Graham LD, O'Han MK, Muthukaruppan A, Yan X, Firth SM, Baxter RC 2007 Molecular basis of the interaction between IGFBP-3 and retinoid X receptor: role in modulation of RAR-signaling. *Arch Biochem Biophys* 465:359–369
  24. Chan SS, Schedlich LJ, Twigg SM, Baxter RC 2009 Inhibition of adipocyte differentiation by insulin-like growth factor-binding protein-3. *Am J Physiol Endocrinol Metab* 296:E654–E663
  25. Baxter RC, Twigg SM 2009 Actions of IGF binding proteins and related proteins in adipose tissue. *Trends Endocrinol Metab* 20:499–505
  26. Peters I, Tossidou I, Achenbach J, Woroniecki R, Mengel M, Park JK, Paschy M, de Groot K, Haller H, Schiffer M 2006 IGF-binding protein-3 modulates TGF- $\beta$ /BMP-signaling in glomerular podocytes. *J Am Soc Nephrol* 17:1644–1656
  27. Gosteli-Peter MA, Winterhalter KH, Schmid C, Froesch ER, Zapf J 1994 Expression and regulation of insulin-like growth factor-I (IGF-I) and IGF-binding protein messenger ribonucleic acid levels in tissues of hypophysectomized rats infused with IGF-I and growth hormone. *Endocrinology* 135:2558–2567
  28. Firth SM, Ganeshprasad U, Poronnik P, Cook DI, Baxter RC 1999 Adenoviral-mediated expression of human insulin-like growth factor-binding protein-3. *Protein Expr Purif* 16:202–211
  29. Firth SM, Ganeshprasad U, Baxter RC 1998 Structural determinants of ligand and cell-surface binding of insulin-like growth factor-binding protein-3. *J Biol Chem* 273:2631–2638
  30. Deng Y, Scherer PE 2010 Adipokines as novel biomarkers and regulators of the metabolic syndrome. *Ann NY Acad Sci* 1212:E1–E19
  31. Jenkins G 2008 The role of proteases in transforming growth factor- $\beta$  activation. *Int J Biochem Cell Biol* 40:1068–1078
  32. Ignatz RA, Massagué J 1985 Type  $\beta$  transforming growth factor controls the adipogenic differentiation of 3T3 fibroblasts. *Proc Natl Acad Sci USA* 82:8530–8534
  33. Horie T, Ono K, Kinoshita M, Nishi H, Nagao K, Kawamura T, Abe Y, Wada H, Shimatsu A, Kita T, Hasegawa K 2008 TG-interacting factor is required for the differentiation of preadipocytes. *J Lipid Res* 49:1224–1234
  34. Choy L, Skillington J, Derynck R 2000 Roles of autocrine TGF- $\beta$  receptor and Smad signaling in adipocyte differentiation. *J Cell Biol* 149:667–682
  35. Yakar S, Rosen CJ, Bouxsein ML, Sun H, Mejia W, Kawashima Y, Wu Y, Emerton K, Williams V, Jepsen K, Schaffler MB, Majeska RJ, Gavrilova O, Gutierrez M, Hwang D, Pennisi P, Frystyk J, Boisclair Y, Pintar J, Jasper H, Domene H, Cohen P, Clemmons D, LeRoith D 2009 Serum complexes of insulin-like growth factor-1 modulate skeletal integrity and carbohydrate metabolism. *FASEB J* 23:709–719
  36. Fritton JC, Kawashima Y, Mejia W, Courtland HW, Elis S, Sun H, Wu Y, Rosen CJ, Clemmons D, Yakar S 2010 The insulin-like growth factor-1 binding protein acid-labile subunit alters mesenchymal stromal cell fate. *J Biol Chem* 285:4709–4714
  37. Schmierer B, Hill CS 2007 TGF $\beta$ -SMAD signal transduction: molecular specificity and functional flexibility. *Nat Rev Mol Cell Biol* 8:970–982
  38. Rahimi N, Tremblay E, McAdam L, Roberts A, Elliott B 1998 Autocrine secretion of TGF- $\beta$  1 and TGF- $\beta$  2 by pre-adipocytes and adipocytes: a potent negative regulator of adipocyte differentiation and proliferation of mammary carcinoma cells. *In Vitro Cell Dev Biol Anim* 34:412–420
  39. Tsurutani Y, Fujimoto M, Takemoto M, Irisuna H, Koshizaka M, Onishi S, Ishikawa T, Mezawa M, He P, Honjo S, Maezawa Y, Saito Y, Yokote K 2011 The roles of transforming growth factor- $\beta$  and Smad3 signaling in adipocyte differentiation and obesity. *Biochem Biophys Res Commun* 407:68–73
  40. O'Han MK, Baxter RC, Schedlich LJ 2009 Effects of endogenous insulin-like growth factor binding protein-3 on cell cycle regulation in breast cancer cells. *Growth Factors* 27:394–408
  41. Hwang DL, Lee PD, Cohen P 2008 Quantitative ontogeny of murine insulin-like growth factor (IGF)-I, IGF-binding protein-3 and the IGF-related acid-labile subunit. *Growth Horm IGF Res* 18:65–74
  42. Ahdjoudj S, Kaabeche K, Holy X, Fromigé O, Modrowski D, Zérath E, Marie PJ 2005 Transforming growth factor- $\beta$  inhibits CCAAT/enhancer-binding protein expression and PPAR $\gamma$  activity in unloaded bone marrow stromal cells. *Exp Cell Res* 303:138–147
  43. Wei J, Ghosh AK, Sargent JL, Komura K, Wu M, Huang QQ, Jain M, Whitfield ML, Feghali-Bostwick C, Varga J 2010 PPAR $\gamma$  down-regulation by TGF $\beta$  in fibroblast and impaired expression and function in systemic sclerosis: a novel mechanism for progressive fibrogenesis. *PLoS One* 5:e13778
  44. Guo B, Koya D, Isono M, Sugimoto T, Kashiwagi A, Haneda M 2004 Peroxisome proliferator-activated receptor- $\gamma$  ligands inhibit TGF- $\beta$  1-induced fibronectin expression in glomerular mesangial cells. *Diabetes* 53:200–208
  45. Ghosh AK, Bhattacharyya S, Wei J, Kim S, Barak Y, Mori Y, Varga J 2009 Peroxisome proliferator-activated receptor- $\gamma$  abrogates Smad-dependent collagen stimulation by targeting the p300 transcriptional coactivator. *FASEB J* 23:2968–2977
